August 2012

# PSYCHIATRIC SERVICES

A Journal of the  
American Psychiatric  
Association

- ◆ Festschrift for Gary Bond:  
Fidelity Assessment in  
Psychiatric Rehabilitation
- ◆ Strategies for Ensuring  
ACT Team Quality:  
A Literature Review
- ◆ Impact of California's  
Mental Health Services Act:  
Fewer Emergency Visits
- ◆ Preliminary Program  
for the 2012 Institute  
on Psychiatric Services

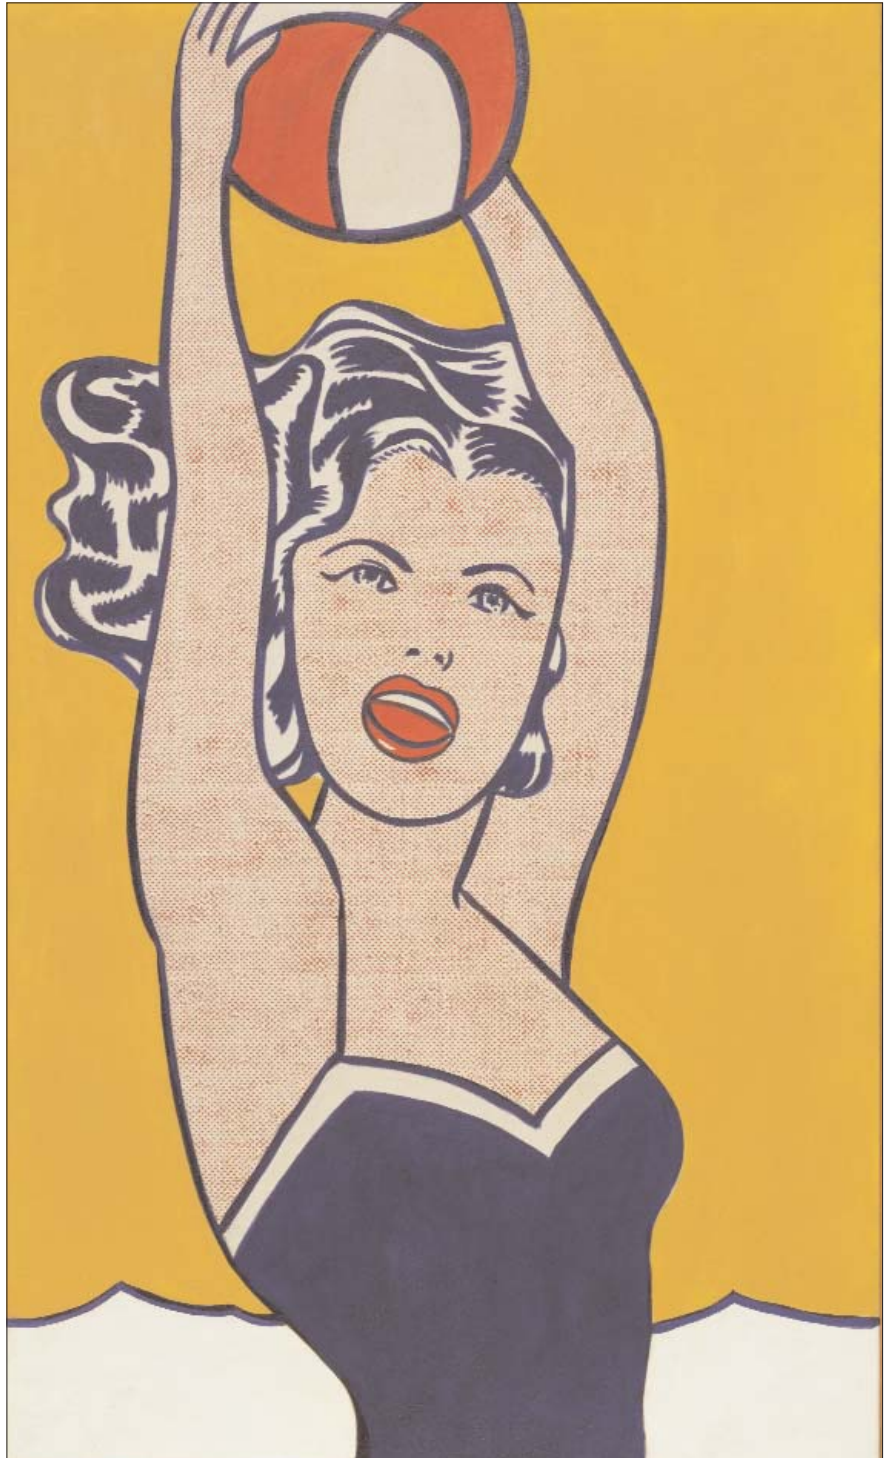

Source: https://psychiatryonline.org/doi/suppl/10.1176/ps.2012.63.issue-8/suppl_file/cover.pdf
